# Supplementary material
Source: PubMed Central journal article supplement (PMC5010645)
Supplement: mmc1.pdf [file mmc1.pdf]

**The American Journal of Human Genetics, Volume 99**

**Supplemental Data**

**Mutations in *PADI6* Cause Female Infertility**

**Characterized by Early Embryonic Arrest**

**Yao Xu, Yingli Shi, Jing Fu, Min Yu, Ruizhi Feng, Qing Sang, Bo Liang, Biaobang Chen, Ronggui Qu, Bin Li, Zheng Yan, Xiaoyan Mao, Yanping Kuang, Li Jin, Lin He, Xiaoxi Sun, and Lei Wang**

A

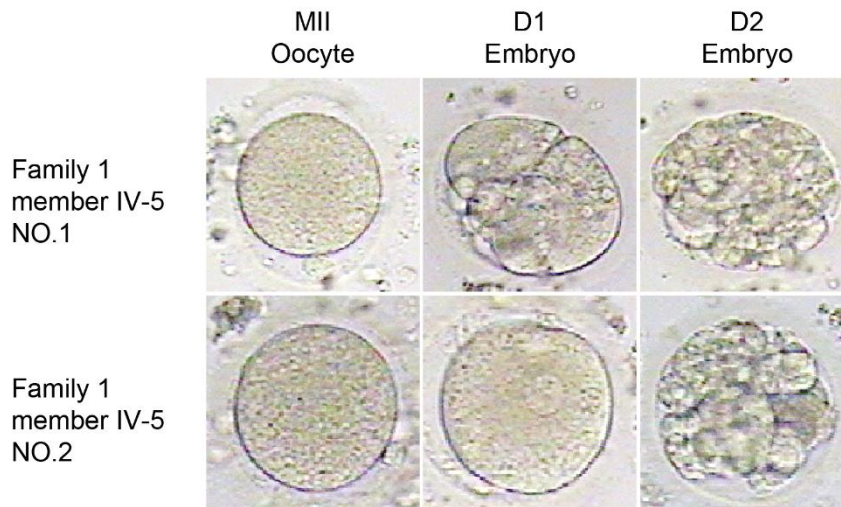

B

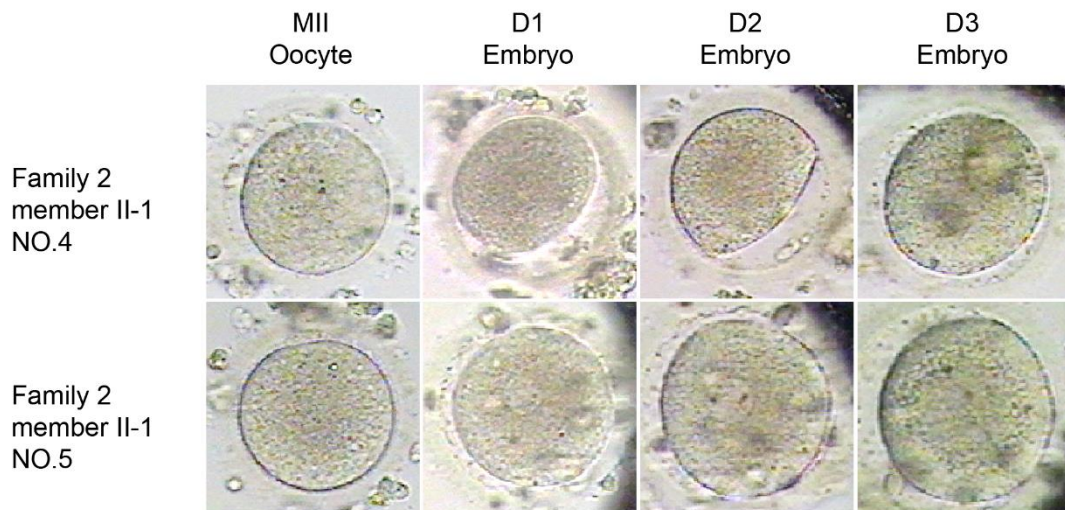

**Figure S1. Morphology of patients' embryos.**

(A) Arrested embryos in the last ICSI cycle of patient IV-5 in family 1. (B) Uncleaved embryos in the last ICSI cycle of patient II-1 in family 2. D1(Day 1), D2(Day 2) and D3 (Day 3).

**Table S1. List of primers used to detect expression of PADI6 and transcriptional activation-related genes.**

| Primer name | Sequence              |
|-------------|-----------------------|
| PADI6-RT-F  | ATGCCGTTTGTGTGTTGGG   |
| PADI6-RT-R  | TCTCAGAAATCACCGTGTGG  |
| CPEB1-RT-F  | CACACACTCGGTACTGAGCAT |
| CPEB1-RT-R  | GGCTGCTAGATCGAGAGTCC  |
| CFL1-RT-F   | TACGCCACCTTTGTCAAGATG |

|            |                         |
|------------|-------------------------|
| CFL1-RT-R  | CCTTGGAGCTGGCATAAATCAT  |
| BTF3 -RT-F | CCAAGGAACAGTGATCCACTTT  |
| BTF3 -RT-R | AGCTGCTTTGTCTCAGCATGG   |
| ZAR1-RT-F  | ACCCTTACCGAGTGGAGGATA   |
| ZAR1-RT-R  | CGCACAAATCTTGACGGTGG    |
| ANLN-RT-F  | ATGTCTTCGTGGCCGATTTGA   |
| ANLN-RT-R  | CTCTGACAGTGAGTTTCCTGTTT |
| ECT2-RT-F  | TGTAGTCACGGACTTTCAGGA   |
| ECT2-RT-R  | GTACAATACAACGGGCGACAT   |
| YBX2-RT-F  | GCTGGCAATCCAAGTCCTG     |
| YBX2-RT-R  | TCAAATTCACAGTCTCCCAT    |
